# Supplementary material for: Gender Differences in Plastic Surgery Trainee Confidence: A Pilot Analysis During Cleft Lip Simulation
Source: PubMed Central journal article supplement — Plast Reconstr Surg Glob Open. 2023 Dec 7;11(12):e5428. doi: 10.1097/GOX.0000000000005428 (PMC10703114; doi:10.1097/gox.0000000000005428), 2023-12-07
Supplement: gox-11-e5428-s001.pdf [file gox-11-e5428-s001.pdf]

## Appendix 1. Overall Procedural Self-Confidence Scale

| <i>Please rate your performance on the procedure you just performed (scale of 1 to 5)</i>                                                        |   |                                                        |   |                                                                                     |
|--------------------------------------------------------------------------------------------------------------------------------------------------|---|--------------------------------------------------------|---|-------------------------------------------------------------------------------------|
| How confident were you overall during the procedure?                                                                                             |   |                                                        |   |                                                                                     |
| 1<br>Not at all                                                                                                                                  | 2 | 3<br>Confident                                         | 4 | 5<br>Level of an<br>Attending surgeon                                               |
| What was your surgical skill level during the procedure?                                                                                         |   |                                                        |   |                                                                                     |
| 1<br>I felt I had<br>None whatsoever                                                                                                             | 2 | 3<br>Average, as required<br>of a resident of my level | 4 | 5<br>Well above average and<br>only rarely encountered<br>in a resident of my level |
| Were you worried during the procedure?                                                                                                           |   |                                                        |   |                                                                                     |
| 1<br>Constantly worried<br>something was going<br>to go wrong (life-threatening<br>complication) or I was not<br>operating at the required level | 2 | 3<br>Occasionally<br>worried                           | 4 | 5<br>I felt completely calm,<br>not worried at all                                  |
| Were you anxious during the procedure?                                                                                                           |   |                                                        |   |                                                                                     |
| 1<br>Constantly anxious,<br>I had "flutters in my<br>stomach" during the<br>whole procedure                                                      | 2 | 3<br>Occasionally<br>anxious                           | 4 | 5<br>Not at all                                                                     |
| Based on your performance today, would you have liked to have avoid this procedure altogether?                                                   |   |                                                        |   |                                                                                     |
| 1<br>Indeed                                                                                                                                      | 2 | 3<br>Only occasionally<br>during the procedure         | 4 | 5<br>On the contrary,<br>I would do it again<br>any time                            |
| How comfortable were you with the independent planning and performing of the procedure?                                                          |   |                                                        |   |                                                                                     |
| 1<br>Very uncomfortable                                                                                                                          | 2 | 3<br>Average                                           | 4 | 5<br>Very Comfortable<br>(Level of an<br>attending surgeon)                         |
