# Supplementary material for: Gender Differences in Plastic Surgery Trainee Confidence: A Pilot Analysis During Cleft Lip Simulation
Source: PubMed Central journal article supplement — Plast Reconstr Surg Glob Open. 2023 Dec 7;11(12):e5428. doi: 10.1097/GOX.0000000000005428 (PMC10703114; doi:10.1097/gox.0000000000005428), 2023-12-07
Supplement: gox-11-e5428-s002.pdf [file gox-11-e5428-s002.pdf]

## Appendix 2. Confidence with Cleft Lip Specific Knowledge/Skill

| <i>On a scale of 1 to 4, please rate your confidence for the following statements.</i>     |            |           |           |  |
|--------------------------------------------------------------------------------------------|------------|-----------|-----------|--|
| I understand the anatomy of the unilateral cleft lip/nasal deformity                       |            |           |           |  |
| 1                                                                                          | 2          | 3         | 4         |  |
| Not at all                                                                                 | Little     | Somewhat  | Very      |  |
| Confident                                                                                  | Confidence | Confident | Confident |  |
| I can independently formulate a treatment plan for a patient with unilateral cleft lip     |            |           |           |  |
| 1                                                                                          | 2          | 3         | 4         |  |
| Not at all                                                                                 | Little     | Somewhat  | Very      |  |
| Confident                                                                                  | Confidence | Confident | Confident |  |
| I can independently mark a unilateral cleft lip repair                                     |            |           |           |  |
| 1                                                                                          | 2          | 3         | 4         |  |
| Not at all                                                                                 | Little     | Somewhat  | Very      |  |
| Confident                                                                                  | Confidence | Confident | Confident |  |
| I can independently perform a unilateral cleft lip repair                                  |            |           |           |  |
| 1                                                                                          | 2          | 3         | 4         |  |
| Not at all                                                                                 | Little     | Somewhat  | Very      |  |
| Confident                                                                                  | Confidence | Confident | Confident |  |
| I can independently perform primary cleft rhinoplasty                                      |            |           |           |  |
| 1                                                                                          | 2          | 3         | 4         |  |
| Not at all                                                                                 | Little     | Somewhat  | Very      |  |
| Confident                                                                                  | Confidence | Confident | Confident |  |
| I can troubleshoot intra-operative problems (eg. short medial lip) during cleft lip repair |            |           |           |  |
| 1                                                                                          | 2          | 3         | 4         |  |
| Not at all                                                                                 | Little     | Somewhat  | Very      |  |
| Confident                                                                                  | Confidence | Confident | Confident |  |
