# Supplementary material for: Gender Differences in Plastic Surgery Trainee Confidence: A Pilot Analysis During Cleft Lip Simulation
Source: PubMed Central journal article supplement — Plast Reconstr Surg Glob Open. 2023 Dec 7;11(12):e5428. doi: 10.1097/GOX.0000000000005428 (PMC10703114; doi:10.1097/gox.0000000000005428), 2023-12-07
Supplement: gox-11-e5428-s003.pdf [file gox-11-e5428-s003.pdf]

### **Appendix 3. Modified Objective Structured Assessment of Technical Skills (OSATS)**

(Each item rated on a scale of 1-5)

- 1) Respect for Tissue
  - 1 - Frequently used unnecessary force on tissue or caused damage by inappropriate use of instruments
  - 3 - Careful handling of tissue but occasionally caused inadvertent damage
  - 5 - Consistently handled tissue appropriately with minimal damage
  
- 2) Time and Motion
  - 1 - Many unnecessary moves
  - 3 - Efficient time/motion but some unnecessary moves
  - 5 - Economy of movement and maximum efficiency
  
- 3) Instrument Handling
  - 1 - Repeatedly makes tentative or awkward moves with instruments
  - 3 - Competent use of instruments although occasionally appeared stiff or awkward
  - 5 - Fluid moves with instruments and no awkwardness
  
- 4) Flow of Operation and Forward Planning
  - 1 - Frequently stopped operating or needed to discuss next move
  - 3 - Demonstrated ability for forward planning with steady progression of operative procedure
  - 5 - Obviously planned course of operation with effortless flow from one move to the next
