# Supplementary material for: Gender Differences in Plastic Surgery Trainee Confidence: A Pilot Analysis During Cleft Lip Simulation
Source: PubMed Central journal article supplement — Plast Reconstr Surg Glob Open. 2023 Dec 7;11(12):e5428. doi: 10.1097/GOX.0000000000005428 (PMC10703114; doi:10.1097/gox.0000000000005428), 2023-12-07
Supplement: gox-11-e5428-s004.pdf [file gox-11-e5428-s004.pdf]

## Appendix 4. Unilateral Cleft Lip Repair Competency Assessment Tool

|                                        |                                                                                                       | 1 | 2 | 3 | Sum/Max    |
|----------------------------------------|-------------------------------------------------------------------------------------------------------|---|---|---|------------|
| <b>MARKING A CLEFT LIP REPAIR</b>      |                                                                                                       |   |   |   |            |
| 1                                      | Correctly identify anatomic landmarks                                                                 |   |   |   |            |
| 2                                      | Mark appropriate peaks of Cupid's bow on the greater and lesser segments                              |   |   |   |            |
| 3                                      | Design greater segment incision(s) to create a symmetric Cupid's bow                                  |   |   |   |            |
| 4                                      | Preserve excess vermilion on the lesser segment to augment deficient vermilion on the greater segment |   |   |   |            |
| <b>Marking Subtotal</b>                |                                                                                                       |   |   |   | <b>/12</b> |
| <b>PERFORMING A CLEFT LIP REPAIR</b>   |                                                                                                       |   |   |   |            |
| 5                                      | Atraumatic tissue handling                                                                            |   |   |   |            |
| 6                                      | Avoid unnecessarily retaining or over-resecting tissue                                                |   |   |   |            |
| 7                                      | Dissect orbicularis oris muscle and free it's abnormal attachments                                    |   |   |   |            |
| 8                                      | Inferiorly reposition greater segment so the peaks of Cupid's bow are symmetric                       |   |   |   |            |
| 9                                      | Fully mobilize the lesser segment lip and alar base                                                   |   |   |   |            |
| 10                                     | Avoid over-dissection or under-dissection                                                             |   |   |   |            |
| 11                                     | Repair the oral mucosa                                                                                |   |   |   |            |
| 12                                     | Repair the orbicularis oris muscle avoiding deficiency or excess bulk                                 |   |   |   |            |
| 13                                     | Close the nasal floor mucosa                                                                          |   |   |   |            |
| 14                                     | Appropriate suture choice and precise cutaneous repair to minimize scarring                           |   |   |   |            |
| <b>Performing Subtotal</b>             |                                                                                                       |   |   |   | <b>/30</b> |
| <b>IMMEDIATE POST-OPERATIVE RESULT</b> |                                                                                                       |   |   |   |            |
| 15                                     | Symmetric appearance of the peaks of Cupid's bow and philtral height                                  |   |   |   |            |
| 16                                     | Continuity of the vermilion-cutaneous junction and white roll                                         |   |   |   |            |
| 17                                     | Smooth contour of the lip margin                                                                      |   |   |   |            |
| 18                                     | Symmetry of the nasal tip, alar position, and nares                                                   |   |   |   |            |
| <b>Result Subtotal</b>                 |                                                                                                       |   |   |   | <b>/12</b> |
| <b>TOTAL SCORE</b>                     |                                                                                                       |   |   |   | <b>/54</b> |

**Grading scale for all items:**

- 1—performed incorrectly or not at all
- 2—performed somewhat correctly
- 3—performed correctly, acceptable for an attending surgeon
